# Supplementary material for: Spatial Variation of Soil Organic Carbon from Bamen Bay Mangrove in Southern China
Source: MDPI journal article supplement (doi:10.3390/w14203278), 2022-10-18
Supplement: s1 [file s1]

**Table S1.** Two-way ANOVA for testing the effects of geomorphologic setting and soil layer on contents of SOC

| Source                  | Type III Sum of Squares | df  | Mean Square | F       | Sig.   |
|-------------------------|-------------------------|-----|-------------|---------|--------|
| Corrected Model         | 513.832 <sup>a</sup>    | 47  | 10.933      | 3.017   | <0.001 |
| Intercept               | 1297.570                | 1   | 1297.570    | 358.031 | <0.001 |
| Geomorphologic settings | 243.711                 | 2   | 121.856     | 33.623  | <0.001 |
| depth                   | 53.026                  | 15  | 3.535       | 0.975   | 0.487  |
| Geom*depth              | 217.095                 | 30  | 7.236       | 1.997   | 0.006  |
| Error                   | 347.922                 | 96  | 3.624       |         |        |
| Total                   | 2159.324                | 144 |             |         |        |

<sup>a</sup> R Square = 0.618 (Adjusted R Squared = 0.431), 3 replicates and 95% confidence level

**Table S2.** Two-way ANOVA for testing the effects of geomorphologic setting and soil layer on storages of SOC

| Source                  | Type III Sum of Squares | df  | Mean Square | F      | Sig.   |
|-------------------------|-------------------------|-----|-------------|--------|--------|
| Corrected Model         | 3734.817 <sup>a</sup>   | 47  | 79.656      | 4.651  | .000   |
| Intercept               | 18246.411               | 1   | 18246.411   | 1065   | <0.001 |
| Geomorphologic settings | 1655.575                | 2   | 827.788     | 48.329 | <0.001 |
| depth                   | 687.166                 | 15  | 45.811      | 2.675  | <0.01  |
| Geom*depth              | 1401.076                | 30  | 46.703      | 2.727  | <0.001 |
| Error                   | 1644.313                | 96  | 17.128      |        |        |
| Total                   | 23634.541               | 144 |             |        |        |

<sup>a</sup> R Square = 0.695 (Adjusted R Squared = 0.545), 3 replicates and 95% confidence level.
